# Supplementary material for: High Incidence of Protein-Truncating TP53 Mutations in BRCA1-Related Breast Cancer
Source: Oxford University Press journal article supplement (doi:10.1158/0008-5472.can-08-3426), 2009-03-31
Supplement: 00085472can083426-sup-sfig_6.pdf [file 00085472can083426-sup-sfig_6.pdf]

**Table S6: Sequencing Primers**

| exon | primer             | primer sequence        | Tm | number of nucleotides |
|------|--------------------|------------------------|----|-----------------------|
| 2    | tp53-ex2FW nested  | ctggatccccacttttcctc   | 62 | 20                    |
|      | tp53-ex2FW         | tggaagtgtctcatgctggat  | 62 | 21                    |
|      | tp53-ex2REV        | gcagaaagtcatgccatgg    | 62 | 20                    |
| 3    | tp53-ex3FW         | acctgtgggaagcgaaaattc  | 62 | 21                    |
|      | tp53-ex3FW nested  | gaaaattccatgggactgactt | 62 | 22                    |
|      | tp53-ex3REV        | gagcagtcagaggaccaggt   | 64 | 20                    |
| 4    | tp53-ex4FW         | acctggtcctctgactgctc   | 64 | 20                    |
|      | tp53-ex4REV        | agaaatgcagggggatacgg   | 62 | 20                    |
|      | tp53-ex4REV nested | caggcattgaagtctcatgga  | 62 | 21                    |
| 5    | tp53-ex5FW         | acatgtttgtttcttgctgcc  | 62 | 22                    |
|      | tp53-ex5FW nested  | tcaactgtgccctgactttca  | 62 | 21                    |
|      | tp53-ex5REV        | gagcaatcagtgaggaatcag  | 62 | 21                    |
| 6    | tp53-ex6FW         | agagacgacagggctggttg   | 64 | 20                    |
|      | tp53-ex6REV        | tcaaataagcagcaggagaaag | 62 | 22                    |
|      | tp53-ex6REV nested | gccactgacaaccaccctta   | 62 | 20                    |
| 7    | tp53-ex7FW         | gcctcccctgcttgccac     | 62 | 18                    |
|      | tp53-ex7FW nested  | aggtctccccaaggcgcact   | 66 | 20                    |
|      | tp53-ex7REV        | gtcagaggcaagcagaggc    | 62 | 19                    |
|      | tp53-ex7REV nested | acagcaggccagtgtcagg    | 66 | 20                    |
| 8    | tp53-ex8FW         | gttgggagtagatggagcct   | 62 | 20                    |
|      | tp53-ex8FW nested  | gatttccttactgcctcttgc  | 62 | 21                    |
|      | tp53-ex8REV        | gcataactgcacccttggtc   | 62 | 20                    |
| 9    | tp53-ex9FW         | gggtgcagttatgcctcaga   | 62 | 20                    |
|      | tp53-ex9REV        | tgccccaattgcaggtaaac   | 62 | 21                    |
|      | tp53-ex9REV nested | tagactggaaacttccacttg  | 62 | 22                    |
